# Supplementary material
Source: Springer Nature journal article supplement (https://www.springermedizin.de/resource/supplementary/13012_2011_482_MOESM4_ESM.pdf/9630076)
Supplement: MOESM4 [file 9630076]

**Additional File 4. Comparison of the refined framework, closed sort task, and open sort task groupings**

| Original Framework<br>Domains + related ICCs<br>and congruency                                              | Refined framework domain name<br>and constructs                                                                                                                                                                                                      | Closed Sort Task                                                                                                                                                                             |                                                                                                                                                                                                                | Open Sort Task                                                                                                                                                                                                                                                                                                                                                                               |                                                                                                                                                           |                             |
|-------------------------------------------------------------------------------------------------------------|------------------------------------------------------------------------------------------------------------------------------------------------------------------------------------------------------------------------------------------------------|----------------------------------------------------------------------------------------------------------------------------------------------------------------------------------------------|----------------------------------------------------------------------------------------------------------------------------------------------------------------------------------------------------------------|----------------------------------------------------------------------------------------------------------------------------------------------------------------------------------------------------------------------------------------------------------------------------------------------------------------------------------------------------------------------------------------------|-----------------------------------------------------------------------------------------------------------------------------------------------------------|-----------------------------|
|                                                                                                             |                                                                                                                                                                                                                                                      | Constructs achieving p<.05 <sup>a</sup> (in<br>order of confidence rating high –<br>low)                                                                                                     | Mean Confidence<br>rating (95% Conf.<br>Int. Lower, Upper)                                                                                                                                                     | Construct clusters (in order of s(i)<br>values – decreasing; <i>Italicised</i><br>constructs silhouette value <.25)                                                                                                                                                                                                                                                                          | Silhouette<br>values s(i)                                                                                                                                 | Av. s(i) of<br>cluster s(i) |
| <b>1. Knowledge</b><br>ICC(C,1) = 0.39<br>CS Cong. = 40%<br>OS Cong. = 0%                                   | <b>1. Knowledge</b><br>Knowledge <sup>b</sup><br>Procedural knowledge<br>Knowledge of task environment                                                                                                                                               | Knowledge <sup>b</sup><br>Procedural knowledge<br>Knowledge of task environment                                                                                                              | 8.50*** (6.91, 10.00)<br>6.72*** (4.79, 8.65)<br>6.33** (4.22, 8.44)                                                                                                                                           | - No cluster representing Knowledge -                                                                                                                                                                                                                                                                                                                                                        | -                                                                                                                                                         | -                           |
| <b>2. Skills</b><br>ICC(C,1) = 0.38<br>CS Cong. = 88%<br>OS Cong. = 75%                                     | <b>2. Skills</b><br>Skills<br>Skills development<br>Competence<br>Ability<br>Interpersonal skills<br>Practice<br>Skill assessment                                                                                                                    | Skills<br>Skills development<br>Competence<br>Ability<br>Interpersonal skills<br>Practice<br>Skill assessment                                                                                | 8.56*** (7.24, 9.87)<br>7.11*** (5.34, 8.88)<br>6.39*** (4.49, 8.29)<br>6.33*** (4.43, 8.23)<br>5.61** (3.47, 7.76)<br>5.56** (3.41, 7.70)<br>4.39* (2.31, 6.46)                                               | Competence<br>Skills<br>Skill assessment<br>Ability<br>Interpersonal skills<br>Skills development<br>Procedural knowledge                                                                                                                                                                                                                                                                    | 0.59<br>0.56<br>0.48<br>0.48<br>0.39<br>0.38<br>0.25                                                                                                      | -<br><i>0.45</i>            |
| <b>3. Social/ Professional Role<br/>and Identity</b><br>ICC(C,1) = 0.34<br>CS Cong. = 70%<br>OS Cong. = 40% | <b>3. Social/ Professional Role and<br/>Identity</b><br>Professional identity<br>Professional role<br>Social identity<br>Identity<br>Professional boundaries<br>Professional confidence<br>Group identity<br>Leadership<br>Organisational commitment | Professional identity<br>Professional role<br>Social identity<br>Identity<br>Professional boundaries<br>Professional confidence<br>Leadership<br>Group identity<br>Organisational commitment | 8.06*** (6.45, 9.66)<br>7.94*** (6.38, 9.51)<br>6.17** (4.09, 8.24)<br>6.06** (4.01, 8.1)<br>6.00*** (4.19, 7.81)<br>6.00*** (4.00, 8.00)<br>5.33** (3.52, 7.15)<br>5.17** (3.15, 7.18)<br>4.39** (2.74, 6.04) | Organisational development<br>Organisational culture/climate<br>Management commitment<br>Professional role<br>Crew resource management<br>Leadership<br>Change management<br>Professional boundaries<br>Organisational commitment<br>Supervision<br>Professional identity<br>Project management<br><i>Champions / To champion</i><br><i>Team working</i><br><i>Power</i><br><i>Hierarchy</i> | 0.50<br>0.45<br>0.41<br>0.40<br>0.38<br>0.37<br>0.36<br>0.36<br>0.35<br>0.34<br>0.34<br>0.31<br><i>0.19</i><br><i>0.13</i><br><i>0.02</i><br><i>-0.03</i> | 0.38<br><i>0.31</i>         |
| <b>4. Beliefs about<br/>Capabilities</b><br>ICC(C,1) = 0.40<br>CS Cong. = 70%                               | <b>4. Beliefs about Capabilities</b><br>Self-confidence<br>Perceived competence                                                                                                                                                                      | Self-confidence<br>Perceived competence                                                                                                                                                      | 8.06*** (6.84, 9.27)<br>7.78*** (6.23, 9.33)                                                                                                                                                                   | Self-efficacy<br>Perceived competence                                                                                                                                                                                                                                                                                                                                                        | 0.59<br>0.56                                                                                                                                              | 0.50<br><i>0.45</i>         |

|                                                                                                                                  |                                                                                                                                                                 |                                                                                                                                                                                                 |                                                                                                                                                                                         |                                                                                                                                                                                                                                                                          |                                                               |              |
|----------------------------------------------------------------------------------------------------------------------------------|-----------------------------------------------------------------------------------------------------------------------------------------------------------------|-------------------------------------------------------------------------------------------------------------------------------------------------------------------------------------------------|-----------------------------------------------------------------------------------------------------------------------------------------------------------------------------------------|--------------------------------------------------------------------------------------------------------------------------------------------------------------------------------------------------------------------------------------------------------------------------|---------------------------------------------------------------|--------------|
| OS Cong. (Beliefs about Capabilities cluster) = 60%                                                                              | Self-efficacy<br>Perceived behavioural control<br>Beliefs<br>Self-esteem<br>Empowerment<br>Professional confidence                                              | Self-efficacy<br>Perceived behavioural control<br>Self-esteem<br>Beliefs<br>Empowerment<br>Professional confidence                                                                              | 6.94*** (4.94, 8.95)<br>6.89*** (5.06, 8.72)<br>6.50*** (4.85, 8.15)<br>6.06*** (4.21, 7.9)<br>4.61* (2.45, 6.78)<br>4.39* (2.11, 6.67)                                                 | Self-confidence<br>Perceived behavioural control<br>Professional confidence<br><i>Self-esteem</i>                                                                                                                                                                        | 0.55<br>0.51<br>0.27<br>0.20                                  |              |
| OS Cong. (Optimism cluster) = 20%                                                                                                | <b>5. Optimism</b><br>Optimism<br>Pessimism<br>Unrealistic optimism<br>Identity                                                                                 |                                                                                                                                                                                                 |                                                                                                                                                                                         | Optimism<br>Pessimism<br>Unrealistic optimism<br>Identity<br><i>Mindsets</i>                                                                                                                                                                                             | 0.51<br>0.42<br>0.35<br>0.25<br>-0.01                         | 0.38<br>0.31 |
| <b>5. Beliefs about Consequences</b><br>ICC(C,1) = 0.25<br>CS Cong. = 26%<br>OS Cong. (Beliefs about Consequences cluster) = 21% | <b>6. Beliefs about Consequences</b><br>Outcome expectancies<br>Chars. of outcome expectancies <sup>b</sup><br>Beliefs<br>Consequents<br><br>Anticipated regret | Outcome expectancies<br>Chars. of outcome expectancies <sup>b</sup><br>Beliefs<br>Consequents<br><br>Anticipated regret                                                                         | 7.61*** (6.06, 9.17)<br>6.17*** (4.14, 8.19)<br>5.11*** (2.93, 7.29)<br>4.67* (2.34, 6.44)<br><br>4.39* (2.44, 6.89)                                                                    | Beliefs<br>Attitudes<br>Outcome expectancies<br>Chars. of outcome expectancies <sup>b</sup><br><br><i>Illness representations</i>                                                                                                                                        | 0.61<br>0.58<br>0.56<br>0.43<br><br>0.22                      | 0.55<br>0.48 |
| OS Cong. (Reinforcement cluster) = 38%                                                                                           | <b>7. Reinforcement</b><br>Rewards <sup>b</sup><br>Incentives<br>Punishment<br>Sanctions<br>Contingencies<br>Reinforcement<br>Consequents                       |                                                                                                                                                                                                 |                                                                                                                                                                                         | Rewards <sup>b</sup><br>Incentives<br>Punishment<br>Sanctions<br>Contingencies<br>Reinforcement<br>Consequents                                                                                                                                                           | 0.68<br>0.64<br>0.60<br>0.51<br>0.46<br>0.45<br>0.42          | -<br>0.54    |
| <b>6. Motivation and Goals</b><br>ICC(C,1) = 0.38<br>CS Cong. = 80%<br>OS Cong. (Intentions cluster) = 60%                       | <b>8. Intentions</b><br>Stability of intentions<br>Stages of change model<br>Trans. model and stages of change <sup>b</sup>                                     | Goals (autonomous, controlled)<br>Intrinsic motivation<br>Goal target /setting<br>Distal and proximal goals<br>Goal priority<br>Intention<br>Stability of intentions<br>Certainty of intentions | 7.83*** (6.28, 9.39)<br>7.78*** (6.21, 9.35)<br>7.67*** (6.21, 9.12)<br>7.33*** (5.86, 8.81)<br>6.39*** (4.33, 8.45)<br>5.72** (3.57, 7.88)<br>4.89* (2.73, 7.05)<br>4.56* (2.58, 6.53) | Stability of intentions<br>Stages of change model<br>Trans. model and stages of change <sup>b</sup><br><i>Certainty of intentions</i><br><i>Intention</i><br><i>Commitment</i><br><i>Intrinsic motivation</i><br><i>Mods. of the intention-behaviour gap<sup>b</sup></i> | 0.27<br>0.26<br>0.25<br>0.23<br>0.18<br>0.13<br>0.12<br>-0.06 | 0.26<br>0.17 |
| OS Cong. (Goals cluster) = 40%                                                                                                   | <b>9. Goals</b><br>Goals (distal / proximal)<br>Goal priority<br>Goal / target setting                                                                          |                                                                                                                                                                                                 |                                                                                                                                                                                         | Goal target/ setting<br>Goals (distal / proximal)<br>Goal priority                                                                                                                                                                                                       | 0.54<br>0.44<br>0.44                                          | 0.40<br>0.38 |

|                                                                                                             |                                                                                                                                                                                                                                                   |                                                                                                                                                                                                   |                                                                                                                                                                                                                   |                                                                                                                                                                                                                                                                                                                                                                                                                                                                                                                                            |                                                                                                                                   |              |
|-------------------------------------------------------------------------------------------------------------|---------------------------------------------------------------------------------------------------------------------------------------------------------------------------------------------------------------------------------------------------|---------------------------------------------------------------------------------------------------------------------------------------------------------------------------------------------------|-------------------------------------------------------------------------------------------------------------------------------------------------------------------------------------------------------------------|--------------------------------------------------------------------------------------------------------------------------------------------------------------------------------------------------------------------------------------------------------------------------------------------------------------------------------------------------------------------------------------------------------------------------------------------------------------------------------------------------------------------------------------------|-----------------------------------------------------------------------------------------------------------------------------------|--------------|
|                                                                                                             | Goals (autonomous / controlled)<br>Action planning<br>Implementation intention<br>Goals (distal / proximal)                                                                                                                                       |                                                                                                                                                                                                   |                                                                                                                                                                                                                   | Goals (autonomous / controlled)<br>Action planning<br>Implementation intention<br><i>Representation of tasks</i>                                                                                                                                                                                                                                                                                                                                                                                                                           | 0.39<br>0.35<br>0.26<br>0.22                                                                                                      |              |
| <b>7. Memory, Attention and Decision Processes</b><br>ICC(C,1) = 0.31<br>CS Cong. = 100%<br>OS Cong. = 100% | <b>10. Memory, attention and decision processes</b><br>Memory<br>Attention<br>Attention control<br>Decision making<br>Cognitive overload / tiredness                                                                                              | Memory<br>Attention<br>Attention control<br>Decision making<br>Cognitive overload / tiredness                                                                                                     | 8.33*** (6.70, 9.97)<br>7.89*** (6.36, 9.41)<br>7.06*** (5.30, 8.81)<br>6.72*** (4.79, 8.65)<br>3.50* (1.74, 5.26)                                                                                                | Memory<br><i>Attention control</i><br><i>Attention</i><br><i>Decision making</i><br><i>Appraisal</i><br><i>Schemas</i><br><i>Cognitive overload / tiredness</i>                                                                                                                                                                                                                                                                                                                                                                            | 0.25<br>0.24<br>0.23<br>0.03<br>0.01<br>-0.12<br>-0.20                                                                            | 0.25<br>0.06 |
| <b>8. Environmental Context and Resources</b><br>ICC(C,1) = 0.26<br>CS Cong. = 50%<br>OS Cong. = 75%        | <b>11. Environmental Context and Resources</b><br>Environmental stressors<br>Resources/material resources<br>Barriers and facilitators<br>Organisational culture/climate<br>Person x environment interaction<br>Salient events/critical incidents | Environmental stressors<br>Resources/material resources<br>Barriers and facilitators<br>Organisational culture climate<br>Person x environment interaction<br>Salient events / critical incidents | 7.94*** (6.74, 9.14)<br>6.61*** (4.66, 8.56)<br>5.11** (3.20, 7.02)<br>5.06** (3.08, 7.03)<br>4.72** (2.77, 6.67)<br>4.61** (2.79, 6.43)                                                                          | <i>Conflict- comp. demands, conf. roles<sup>b</sup></i><br><i>Barriers and facilitators</i><br><i>Environmental stressors</i><br><i>Salient events / critical incidents</i><br><i>Resources / material resources</i><br><i>Coping strategies</i><br><i>Knowledge of task environment</i><br><i>Person x environment interaction</i><br><i>Control of behaviour, material and social environment</i><br><i>Knowledge</i><br><i>Empowerment</i><br><i>Negotiation</i><br><i>Anticipated regret</i><br><i>Threat</i><br><i>Past Behaviour</i> | 0.03<br>0.02<br>-0.02<br>-0.05<br>-0.05<br>-0.10<br>-0.13<br>-0.13<br>-0.14<br>-0.14<br>-0.19<br>-0.20<br>-0.21<br>-0.22<br>-0.22 | -<br>-0.12   |
| <b>9. Social Influences</b><br>ICC(C,1) = 0.38<br>CS Cong. = 27%<br>OS Cong. = 27%                          | <b>12. Social Influences</b><br>Social pressure<br>Social norms<br>Group conformity<br>Social comparisons<br>Group norms<br>Social support<br>Intergroup conflict<br>Power<br>Group identity                                                      | Social pressure<br>Social norms<br>Group conformity<br>Social comparisons<br>Group norms<br>Social support<br>Intergroup conflict<br>Power<br>Group identity                                      | 8.89*** (8.38, 9.4)<br>7.61*** (6.04, 9.18)<br>7.39*** (6.34, 8.44)<br>7.22*** (6.10, 8.35)<br>7.17*** (5.39, 8.94)<br>7.06*** (5.03, 9.08)<br>5.61*** (3.85, 7.37)<br>5.00** (3.08, 6.92)<br>4.89** (2.84, 6.93) | Group norms<br>Group conformity<br>Group identity<br>Social pressure<br>Social norms<br>Social support<br>Alienation<br>Social comparisons<br>Intergroup conflict                                                                                                                                                                                                                                                                                                                                                                          | 0.71<br>0.68<br>0.67<br>0.67<br>0.64<br>0.63<br>0.62<br>0.58<br>0.47                                                              | -<br>0.62    |

|                                                                                          |                                                                                                                   |                                                                                             |                                                                                                                                                                     |                                                                                                                                                                                                                                                                                                |                                                                                                  |           |
|------------------------------------------------------------------------------------------|-------------------------------------------------------------------------------------------------------------------|---------------------------------------------------------------------------------------------|---------------------------------------------------------------------------------------------------------------------------------------------------------------------|------------------------------------------------------------------------------------------------------------------------------------------------------------------------------------------------------------------------------------------------------------------------------------------------|--------------------------------------------------------------------------------------------------|-----------|
|                                                                                          | Alienation Modelling                                                                                              | Alienation Modelling                                                                        | 4.56** (2.56, 6.55)<br>4.44* (2.34, 6.55)                                                                                                                           | Social identity                                                                                                                                                                                                                                                                                | 0.45                                                                                             |           |
| <b>10. Emotion</b><br>ICC(C,1) = 0.45<br>CS Cong. = 77%<br>OS Cong. = 77%                | <b>13. Emotion</b><br>Anxiety<br>Fear<br>Affect<br>Stress<br>Depression<br>Positive / negative affect<br>Burn-out | Anxiety<br>Fear<br>Affect<br>Stress<br>Depression<br>Positive / negative affect<br>Burn-out | 8.33*** (7.05, 9.62)<br>8.17*** (6.64, 9.69)<br>8.17*** (6.62, 9.71)<br>7.22*** (5.47, 8.97)<br>7.11*** (5.31, 8.91)<br>6.44*** (4.31, 8.58)<br>5.72** (3.69, 7.75) | Anxiety<br>Depression<br>Positive / negative affect<br>Stress<br>Fear<br>Affect<br>Burn-out                                                                                                                                                                                                    | 0.69<br>0.67<br>0.57<br>0.57<br>0.56<br>0.54<br>0.52                                             | -<br>0.59 |
| <b>11. Behavioural Regulation</b><br>ICC(C,1) = 0.14<br>CS Cong. = 20%<br>OS Cong. = 20% | <b>14. Behavioural Regulation</b><br>Self-monitoring<br>Breaking habit<br>Action planning                         | Self monitoring<br>Breaking habit<br>Action planning                                        | 6.89*** (5.20, 8.58)<br>5.78*** (4.08, 7.47)<br>4.94*** (2.82, 7.06)                                                                                                | <i>Learning</i><br><i>Review</i><br><i>Breaking habit</i><br><i>Direct experience</i><br><i>Self-monitoring</i><br><i>Evaluation</i><br><i>Generating alternatives</i><br><i>Feedback</i><br><i>Practice</i><br><i>Sensitisation</i><br><i>Routine / automatic / habit</i><br><i>Modelling</i> | 0.22<br>0.18<br>0.16<br>0.16<br>0.15<br>0.06<br>0.05<br>0.04<br>-0.04<br>-0.05<br>-0.06<br>-0.13 | -<br>0.06 |
| <b>12. Nature of the Behaviours</b><br>ICC(C,1) = 0.07<br>CS Cong. = 20%                 |                                                                                                                   | Routine / automatic / habit                                                                 | 4.89** (2.82, 6.96)                                                                                                                                                 |                                                                                                                                                                                                                                                                                                |                                                                                                  |           |

**Constructs removed in refinement of framework** (i.e. received low confidence ratings (<3), low silhouette value (<.25) or were associated with redundant domains and were not allocated elsewhere): ‘Appraisal’, ‘Attitudes’, ‘Certainty of intentions’, ‘Champions / To champion’, ‘Change management’, ‘Commitment’, ‘Conflict - competing demands’, ‘conflicting roles’, ‘Control of behaviour, material and social environment’, ‘Coping strategies’, ‘Crew resource management’, ‘Direct experience’, ‘Evaluation’, ‘Feedback’, ‘Generating alternatives’, ‘Hierarchy’, ‘Illness representations’, ‘Intention’, ‘Intrinsic motivation’, ‘Learning’, ‘Management commitment’, ‘Mindsets’, ‘Moderators of the intention - behaviour gap’, ‘Negotiation’, ‘Organisational development’, ‘Past behaviour’, ‘Project management’, ‘Representation of tasks’, ‘Review’, ‘Routine / automatic / habit’, ‘Schemas’, ‘Sensitisation’, ‘Supervision’, ‘Team working’, ‘Threat’.

(key: \*= $p < 0.05$ , \*\*= $p < 0.01$ , \*\*\*= $p < 0.001$ , CS / OS Cong. = Closed Sort / Open Sort Congruency (% of original framework constructs included in sort task domains), Non-Italicised Av. S(i) value = excluding constructs in cluster whose values <0.25, Italicised Av. S(i) value = including all constructs forming cluster in that domain, <sup>a</sup> = after applying Hochberg’s correction for multiple comparisons within each domain; <sup>b</sup> Chars. of outcome expectancies = Characteristics of outcome expectancies, Conflict - comp. demands, conf. roles = Conflict - competing demands, conflicting roles, Knowledge = Knowledge (including knowledge of condition /scientific rationale), Mods. of the intention-behaviour gap = Moderators of the intention-behaviour gap, Rewards = Rewards (proximal / distal, valued / not valued, probable / improbable), Trans. model and stages of change = Transtheoretical model and stages of change.
